# Supplementary material
Source: PubMed Central journal article supplement (PMC6895373)

1 **Supplement**

2

3 **Subcutaneous concizumab prophylaxis in hemophilia A and hemophilia A/B with**  
4 **inhibitors: Phase 2 trial results**

5

6 Amy D. Shapiro, Pantep Angchaisuksiri, Jan Astermark, Gary Benson, Giancarlo Castaman,  
7 Pratima Chowdary, Hermann Eichler, Victor Jiménez-Yuste, Kaan Kavakli, Tadashi  
8 Matsushita, Lone Hvitfeldt Poulsen, Allison P. Wheeler, Guy Young, Silva Zupancic-Salek,  
9 Johannes Oldenburg

10

11 **Supplementary methods**

12

13 *Exclusion criteria for explorer4 and explorer5*

14 Patients were excluded if they had a known inherited or acquired bleeding disorder other than  
15 hemophilia, underwent major surgery within one month prior to the initiation of trial activities  
16 or had a planned surgical procedure during the trial, a previous history or current signs of  
17 thromboembolic disease, significant infection or a known systemic inflammatory condition  
18 requiring systemic treatment at screening, hepatic dysfunction (alanine aminotransferase  
19 [ALT] >3 times the upper limit of normal) and/or renal impairment (estimated glomerular  
20 filtration rate [eGFR]  $\leq 60$  ml/min/1.73m<sup>2</sup>) at screening; platelet count  $\leq 100 \times 10^9/L$  and/or  
21 fibrinogen level less than the lower limit of normal at screening, ongoing or planned immune  
22 tolerance induction (ITI) therapy or prophylaxis with factor VIII (FVIII) or factor IX (FIX)  
23 (explorer4 only), antithrombin levels below the normal reference range at screening (explorer4  
24 only) or a previous history or presence of FVIII inhibitors at screening (explorer5 only).

25

26 *Tissue factor pathway inhibitor (TFPI) assay for concizumab anti-drug antibody-positive*  
27 *samples in explorer4 and explorer5*

28 Samples positive for anti-concizumab antibodies were further characterized for neutralizing  
29 activity using a modified TFPI functionality assay. The assay principle is based on activation  
30 of FX to FXa when functional TF/FVIIa complex is present; this is inhibited by TFPI and further  
31 addition of concizumab restores the signal. If anti-concizumab neutralizing antibodies are  
32 present in a trial sample, TFPI is not inhibited and the FXa generation in the mixture is  
33 decreased. In brief, Protein A purified-antibodies from quality controls and study samples were  
34 mixed and incubated with concizumab for 5 min. Following this, FX, TFPI and TF/FVIIa were  
35 added to the mixture and after 15 min of incubation EDTA and a chromogenic reagent (p-  
36 nitroanilin) were added. After a 10-min incubation, acetic acid was added and the absorption  
37 at 405 nm was measured.

38

#### 39 *Thrombin generation assay in explorer4 and explorer5*

40 The Calibrated Automated Thrombogram (CAT) method (by Thrombinoscope BV) was used  
41 to measure thrombin generation. The analyses were performed on patients' platelet-poor  
42 plasma. PPP-Reagent LOW (1 pM TF) was used as a trigger, added to the platelet-poor  
43 plasma to initiate thrombin generation. PPP-Reagent LOW is particularly recommended to be  
44 used in hemophiliac plasma in order to increase sensitivity to factors VIII, IX and XI. This  
45 method uses a slow-acting fluorogenic substrate that allows continuous measurement of  
46 thrombin generation in double-centrifuged citrated plasma. In this assay set-up, thrombin  
47 generation is initiated by low dose tissue factor that is combined with phospholipid. The result  
48 is obtained by comparison to a constant known thrombin activity in a parallel non-tissue factor  
49 initiated sample. The assay has been validated fit-for-purpose.

50

#### 51 **Supplementary results**

52

#### 53 *Pharmacokinetics and pharmacodynamics*

54 In explorer5 (non-inhibitor trial), the baseline mean (SD) free TFPI was 96.3 (11.1) ng/mL and  
55 was reduced to 30.1 (15.6), 64.4 (35.3) and 12.4 (2.2) ng/mL in the concizumab 0.15, 0.20

56 and 0.25 mg/kg groups, respectively. Of interest, there were two patients in the 0.20 mg/kg  
57 dose group with very low concizumab exposure who did not show a decrease in free TFPI. In  
58 explorer4 (inhibitor trial), concizumab lowered free TFPI from a mean (SD) of 100.7  
59 (12.8) ng/mL at baseline to 26.9 (12.2) ng/mL prior to/at the last dose administration at 24  
60 weeks. As expected, free TFPI was unchanged after 24 weeks of on-demand treatment with  
61 rFVIIa in explorer4.

62

63 Peak thrombin generation (TG) potential at 24 weeks was within the normal reference range  
64 (26–147 nmol/L) across all concizumab dose levels in explorer4 (mean [SD]: 65.0  
65 [34.0] nmol/L) and explorer5 (mean [SD]: 88.6 [34.5], 67.5 [35.0] and 83.4 [10.6] nmol/L for  
66 the 0.15, 0.2 and 0.25 mg/kg groups, respectively).

67

68 **List of explorer4 investigators**

69 Giancarlo Castaman, Gerard Dolan, Ai Goh, Kingsley Hampton, Margareta Holmström, Víctor

70 Jiménez-Yuste, Gili Kenet, Paul Knoebl, Steven Lentz, Tadashi Matsushita, Ramiro Núñez,

71 Silva Zupancic-Salek, Lone Hvitfeldt Poulsen, Elena Santagostino, Amy Shapiro, Oleksandra

72 Stasyshyn, Takashi Suzuki, Lily Wong, Guy Young

73

74 **List of explorer5 investigators**

75 Salih Aksu, Kagehiro Amano, Pantep Angchaisuksiri, Jan Astermark, Gary Benson, Annie

76 Borel Derlon, Santiago Bonanad, Pratima Chowdary, Ahmet Muzaffer Demir, Gerard Dolan,

77 Hermann Eichler, Margareta Holmström, Víctor Jiménez-Yuste, Kaan Kavakli, Tadashi

78 Matsushita, María Eva Mingot Castellano, Johannes Oldenburg, Brigitte Pan Petesch, Allison

79 Paroskie-Wheeler, Elena Santagostino, Oleksandra Stasyshyn, Takashi Suzuki, Emily

80 Symington, Marc Trossaert, Hassan Yaish, Guy Young

81 **Supplementary table and figures**

82

83 **Table S1.** Patient baseline characteristics and treatment and bleed history by treatment arm

84 in explorer4 (HAwl/HBwl).

|                                   | Concizumab   | rFVIIa      | Total        |
|-----------------------------------|--------------|-------------|--------------|
| N                                 | 17           | 9           | 26           |
| Mean age at baseline, y (SD)      | 34.1 (11.1)  | 41.1 (15.0) | 36.5 (12.7)  |
| Mean body weight, kg (SD)         | 71.5 (12.6)  | 70.6 (17.0) | 71.2 (13.9)  |
| Mean time from diagnosis, y (SD)  | 33.5 (11.5)  | 40.3 (15.3) | 35.8 (13.0)  |
| Patients on-demand, n (%)         | 17 (100)     | 9 (100)     | 26 (100)     |
| On-demand mean ABR (min;<br>max)* | 25.3 (6–120) | 18.6 (7–38) | 23.0 (6–120) |

85

86 \*During the treatment regimen. Patients were permitted to be treated with more than one

87 treatment regimen during the 12 months prior to screening.

88 HAwl, hemophilia A with inhibitors; HBwl, hemophilia B with inhibitors; kg, kilogram; rFVIIa,

89 recombinant activated factor VII; SD, standard deviation; y, years

90 **Figure S1.** Patient disposition in (A) explorer4, a concizumab multicenter, open-label  
91 randomized controlled phase 2 trial (HAwI/HBwI); and (B) explorer5, a concizumab  
92 multicenter, single-arm, open-label phase 2 trial (HA without inhibitors).

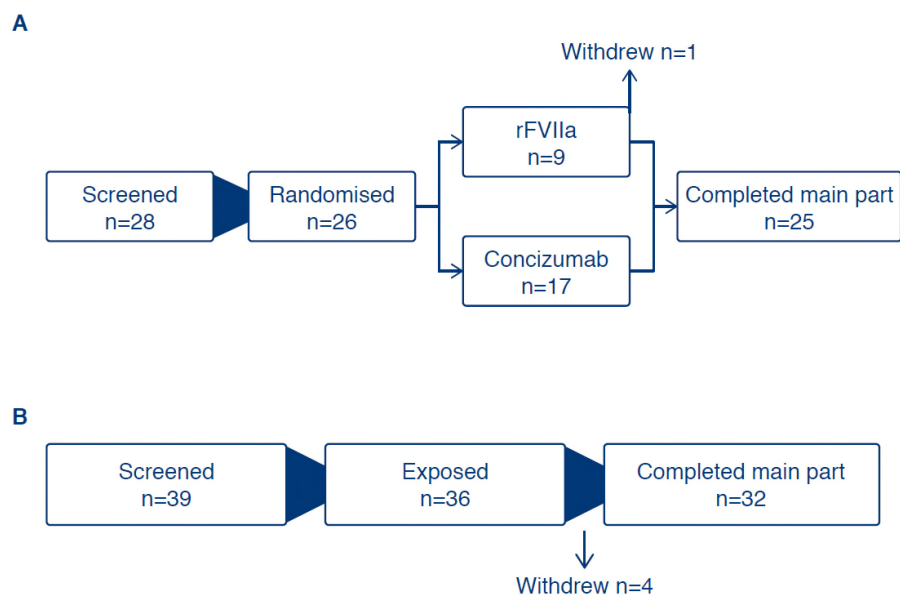

93  
94 A. explorer4: One patient in the rFVIIa arm withdrew his consent on Day 60. B. explorer5: Two  
95 patients withdrew consent on Days 21 and 80 while on 0.15 and 0.25 mg/kg concizumab,  
96 respectively; one patient withdrew from treatment on Day 49 while on 0.15 mg/kg concizumab;  
97 and one patient withdrew due to a lack of treatment efficacy on Day 11 while on 0.15 mg/kg  
98 concizumab. The “lack of efficacy” that led this patient to withdraw was at the discretion of the  
99 treating investigator who provided this explanation for the withdrawal. Because the bleeding  
100 pattern of this patient did not fit the definition of “lack of efficacy” as defined in the protocol  
101 (i.e., 3 spontaneous bleeding episodes within 12 weeks, which also triggered a dose  
102 escalation), the grounds for this withdrawal constituted a protocol deviation. There was no  
103 evidence of anti-drug antibodies in these patients up to the time of withdrawal.  
104 HA, hemophilia A; HAwI, hemophilia A with inhibitors; HBwI, hemophilia B with inhibitors  
105 rFVIIa, recombinant activated factor VII

106 **Figure S2.** Historical and on-trial ABRs for all bleeding episodes in patients treated with (A)  
 107 0.15 mg/kg concizumab or (B) rFVIIa in explorer4 (HAWl/HBwl) and (C) ABR when  
 108 assessing each patient's last concizumab dose level in explorer5 (HA without inhibitors).

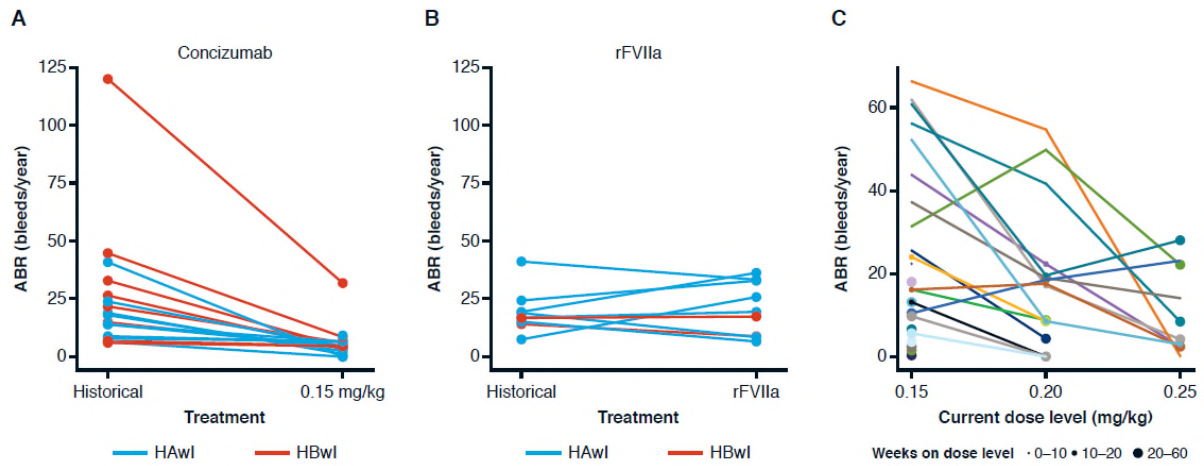

109

110 ABR, annualized bleeding rate; HA, hemophilia A; HAWl, hemophilia A with inhibitors; HBwl,  
 111 hemophilia B with inhibitors rFVIIa, recombinant activated factor VII

# Supplementary Figure S1

A

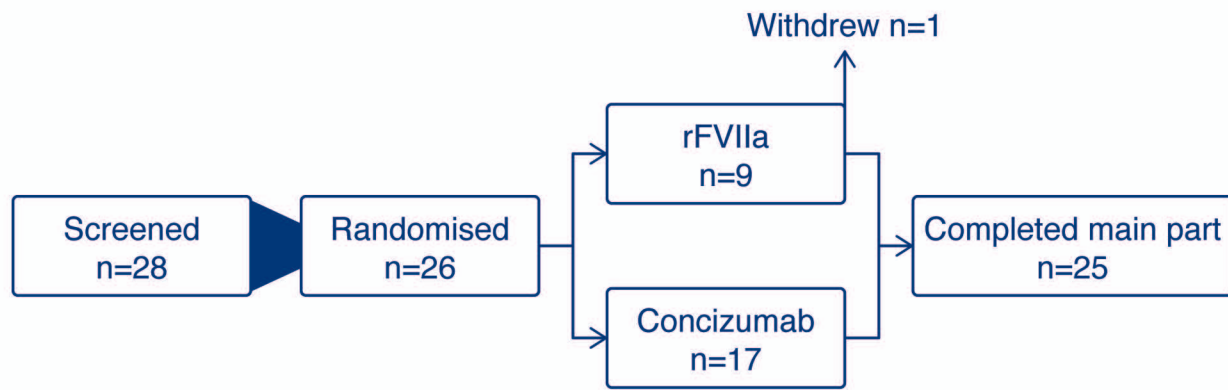

B

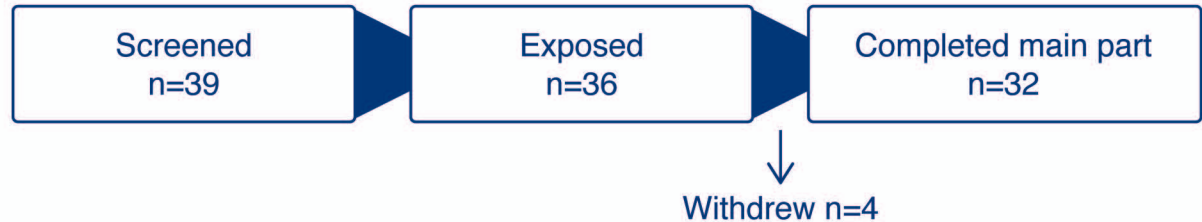



# Supplementary Figure S2

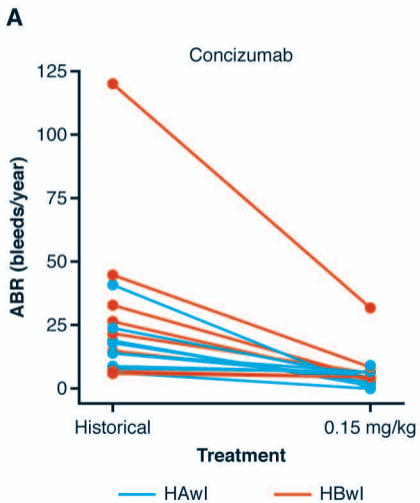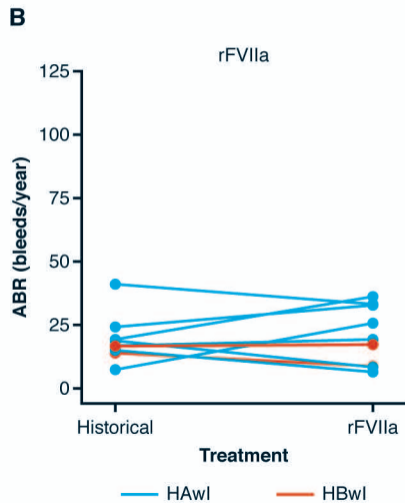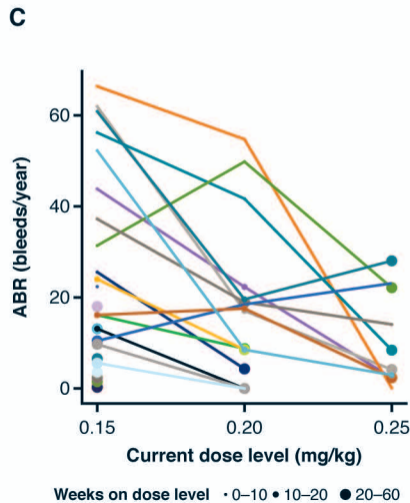

Supplement: bloodBLD2019001542-suppl1.pdf [file bloodBLD2019001542-suppl1.pdf]
